# Supplementary material for: Synergism between IL-33 and MRGPRX2/FcεRI Is Primarily Due to the Complementation of Signaling Modules, and Only Modestly Supplemented by Prolonged Activation of Selected Kinases
Source: MDPI journal article supplement (doi:10.3390/cells12232700), 2023-11-24
Supplement: s1 [file s1]

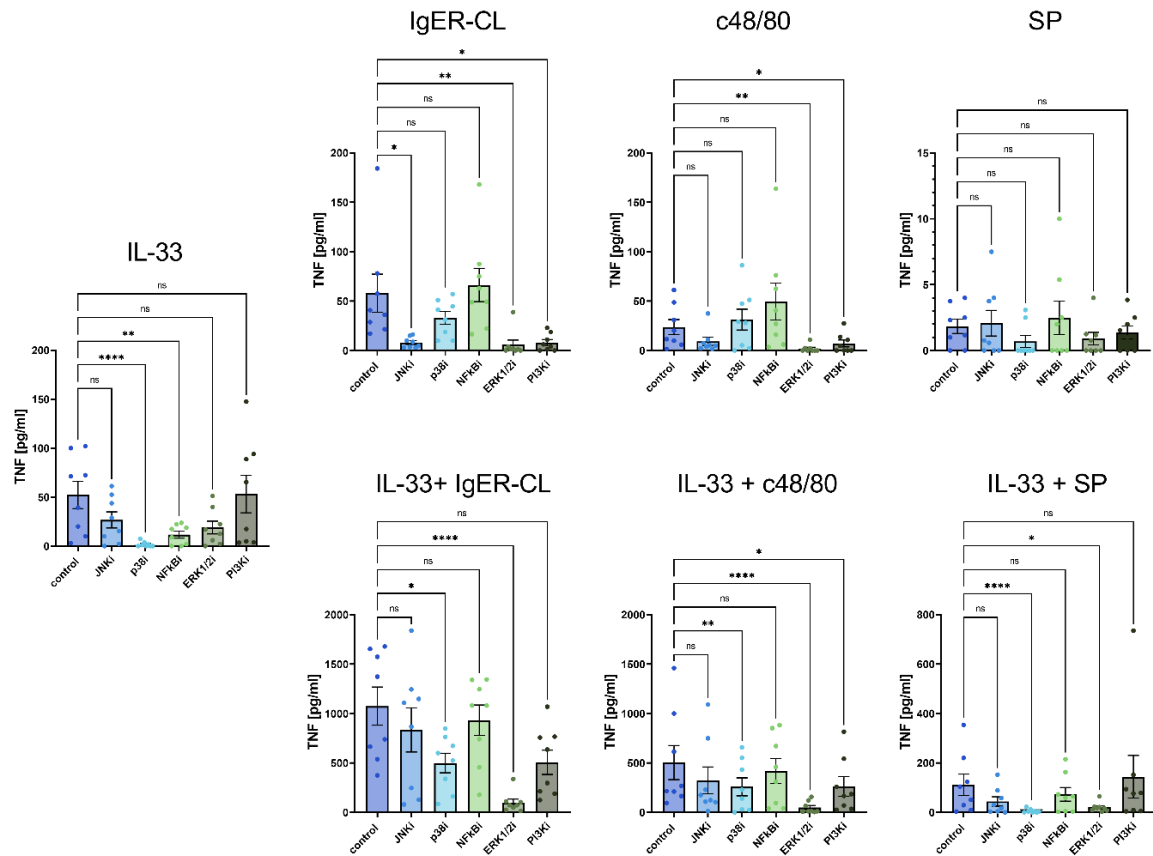

**Figure S1** Contribution of distinct modules to TNF stimulation in dependence of the stimulus. The same data as presented in the main manuscript in Figure 1 but in another set-up is shown to allow for a direct statistical comparison between the different inhibitors upon individual types of stimulation.

Skin MCs were stimulated by IgER-CL (crosslinking, AER-37 at 0.2  $\mu\text{g/ml}$ ) or SP (30  $\mu\text{M}$ ) or c48/80 (10  $\mu\text{g/ml}$ ) or IL-33 (20 ng/ml) for 24 h, TNF was quantified in the resulting supernatants by ELISA. Control; vehicle was used instead of inhibitor. cells were pretreated with the respective inhibitors for 15 min and then stimulated. ERK1/2 inhibitor SCH772984 at 10  $\mu\text{M}$ , JNK inhibitor SP600125 at 10  $\mu\text{M}$ , p38 inhibitor SB203580 at 10  $\mu\text{M}$ . NF- $\kappa$ B inhibitor BAY11-7082 at 1  $\mu\text{M}$ , PI3K inhibitor Pictisilic at 10  $\mu\text{M}$ . \*  $p < 0.05$ , \*\*  $p < 0.01$ , \*\*\*\*  $p < 0.0001$ . Friedman test with Dunn's multiple comparison test. i = inhibitor

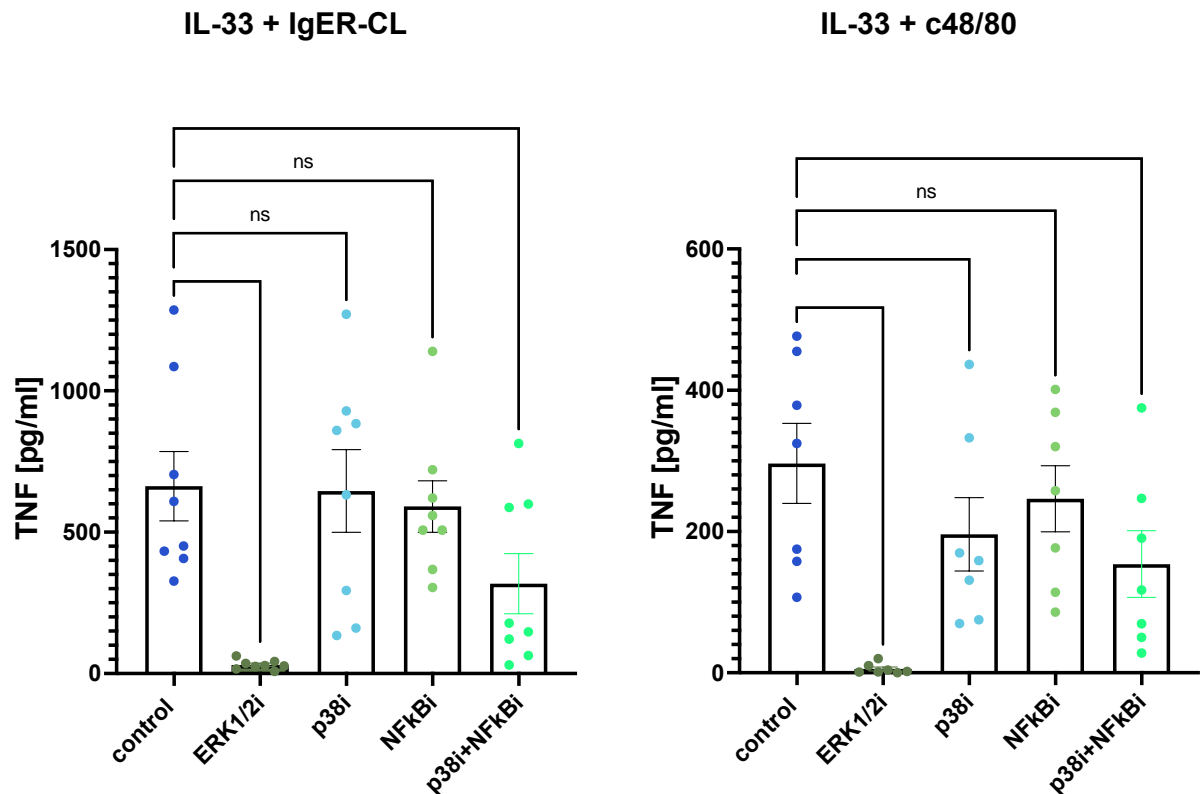

**Figure S2** Simultaneous inhibition of NF- $\kappa$ B and p38 does increase the impact of each inhibitor alone but does not reach the inhibitory potency of ERKi.

Skin MCs were stimulated with a combination of IL-33 (20 ng/ml) and IgER-CL (crosslinking, AER-37 at 0.2  $\mu$ g/ml) or IL-33 (20 ng/ml) and c48/80 (10  $\mu$ g/ml) for 24 h, TNF was quantified in the resulting supernatants by ELISA. Control; vehicle was used instead of inhibitors. cells were pretreated with the respective inhibitors for 15 min and then stimulated. ERK1/2 inhibitor SCH772984 at 10  $\mu$ M, p38 inhibitor SB203580 at 10  $\mu$ M. NF- $\kappa$ B inhibitor BAY11-7082 at 1  $\mu$ M. The same concentrations were used in the combined setting. \*  $p < 0.05$ , \*\*  $p < 0.01$ , \*\*\*  $p < 0.001$ , \*\*\*\*  $p < 0.0001$ . RM one-way ANOVA with Holm-Šidák's multiple comparisons test.

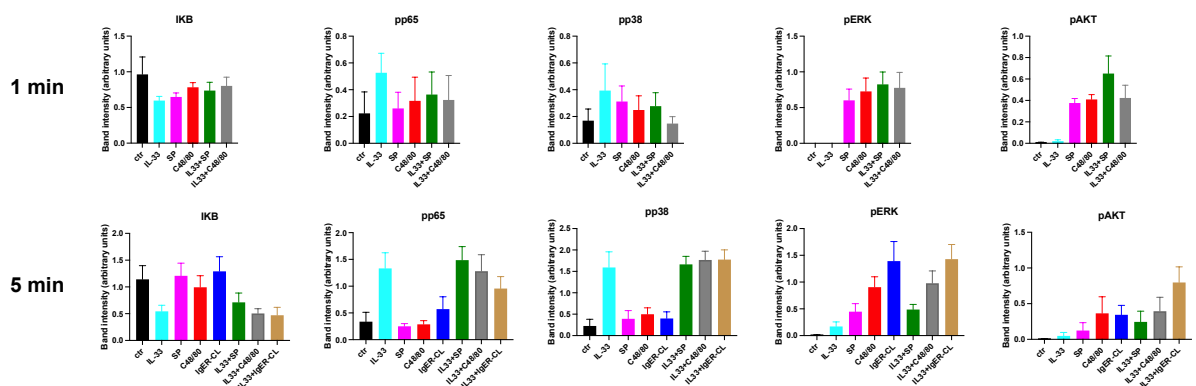

**Figure S3.** IL-33, Fc $\epsilon$ RI and MRGPRX2 triggered signaling events are barely affected by each other at early times. Skin MCs were stimulated by IL-33 (20 ng/ml), IgER-CL (crosslinking, AER-37 at 0.2  $\mu$ g/ml) or SP (30  $\mu$ M), c48/80 (10  $\mu$ g/ml) or the specified combinations for 1 min (top) or 5 min (bottom). The degradation or phosphorylation of signaling components were detected by immunoblot. Cyclophilin B (CyclB) and  $\alpha$ -actinin served as the loading controls. Mean  $\pm$  SEM of  $n = 2-4$ .
